# Supplementary material
Source: PubMed Central journal article supplement (PMC3444674)
Supplement: NIHMS399675-supplement-01.pdf [file NIHMS399675-supplement-01.pdf]

*Supplementary Data for*

Discovery of structurally-diverse inhibitor scaffolds by high-throughput screening of a fragment library with dimethylarginine dimethylaminohydrolase

*Thomas W. Linsky and Walter Fast*

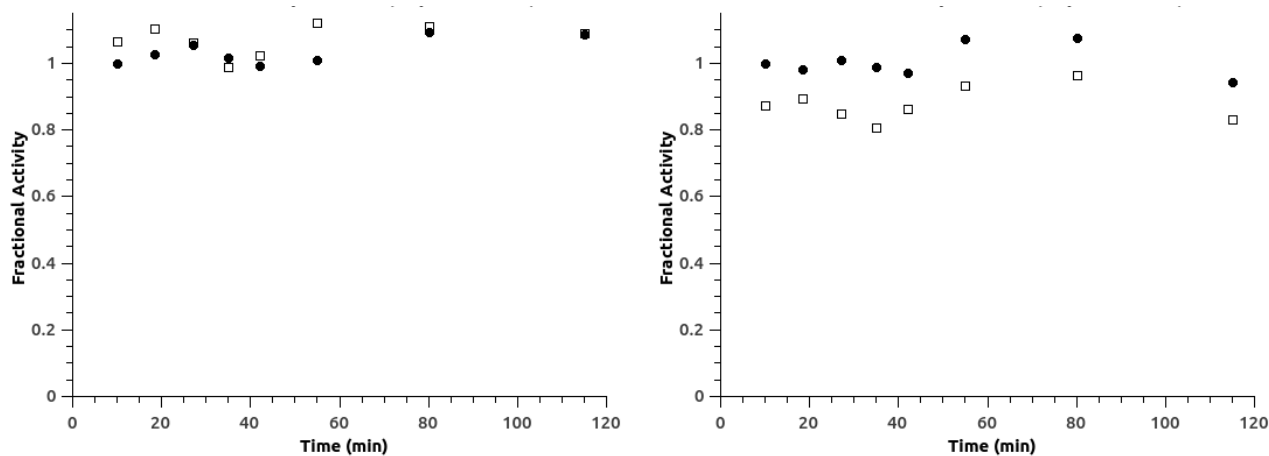

**Figure S1.** Tests for reversibility of human DDAH-1 inhibition by **12** and **13**. Mixtures of **12** (left panel) and **13** (right panel) are rapidly diluted into excess substrate and the recovered activity is measured. Experiments are done in the presence (●) and absence (□) of reduced glutathione (2 mM). See Experimental Procedures for details.
